# Supplementary material for: Diffusion and Friction Dynamics of Probe Molecules in Liquid n-Alkane Systems: A Molecular Dynamics Simulation Study
Source: Hindawi journal article supplement (doi:10.1155/2019/8134904), 2019-02-04
Supplement: f1 [file 8134904.f1.pdf]

# Diffusion and Friction Dynamics of Probe Molecules in Liquid *n*-Alkane

## Systems: A Molecular Dynamics Simulation Study

Song Hi Lee

Chemistry Institute for Functional Materials, Pusan National University,  
Pusan, South Korea.

E-mail: songhilee@pusan.ac.kr

### Supplementary Materials

The log-log plots of the self-diffusion coefficient ( $D_{\text{self}}$ ) of liquid *n*-alkanes, and those of the diffusion coefficients of MY1 ( $D_{\text{MY1}}$ ) and MY2 ( $D_{\text{MY2}}$ ) in liquid *n*-alkane systems *vs* the molecular weight (*M*) of liquid *n*-alkanes at four different temperatures shown in Figs.1 and 2 are obtained from S.Table 1 and the log-log plots of the friction coefficient ( $\zeta_{\text{self}}$ ) of liquid *n*-alkanes, and those of the friction coefficients of MY1 ( $\zeta_{\text{MY1}}$ ) and MY2 ( $\zeta_{\text{MY2}}$ ) in liquid *n*-alkane systems *vs* the molecular weight (*M*) of liquid *n*-alkanes at four different temperatures shown in Figs.3 and 4 are obtained from S.Table 2.

S.Table 1. Logarithm of diffusion coefficients  $D(10^{-6} \text{ cm}^2/\text{s})$  of *n*-alkanes, MY1, and MY2 in *n*-alkanes at  $T = 318, 418, 518, \text{ and } 618 \text{ K}$ .

| <i>n</i> -alkane              | $D_{\text{self}}$ |       |       |       | $D_{\text{MY1}}$ |       |       |       | $D_{\text{MY2}}$ |       |       |       |
|-------------------------------|-------------------|-------|-------|-------|------------------|-------|-------|-------|------------------|-------|-------|-------|
|                               | 318K              | 418K  | 518K  | 618K  | 318K             | 418K  | 518K  | 618K  | 318K             | 418K  | 518K  | 618K  |
| $\text{C}_{12}\text{H}_{26}$  | 1.198             | 1.642 | 1.943 | 2.191 | 1.656            | 2.069 | 2.313 | 2.489 | 0.728            | 1.482 | 2.035 | 2.275 |
| $\text{C}_{20}\text{H}_{42}$  | 0.689             | 1.264 | 1.598 | 1.864 | 1.360            | 1.890 | 2.197 | 2.411 | 0.357            | 1.243 | 1.850 | 2.149 |
| $\text{C}_{28}\text{H}_{58}$  | 0.351             | 1.027 | 1.386 | 1.641 | 1.152            | 1.760 | 2.128 | 2.361 | 0.137            | 1.057 | 1.753 | 2.070 |
| $\text{C}_{36}\text{H}_{74}$  | 0.084             | 0.810 | 1.224 | 1.491 | 1.036            | 1.664 | 2.054 | 2.335 | -0.001           | 0.920 | 1.674 | 2.013 |
| $\text{C}_{44}\text{H}_{90}$  | -0.112            | 0.668 | 1.066 | 1.361 | 0.920            | 1.585 | 2.013 | 2.305 | -0.065           | 0.869 | 1.598 | 1.982 |
| $\text{C}_{80}\text{H}_{162}$ | -0.645            | 0.194 | 0.615 | 0.933 | 0.603            | 1.378 | 1.880 | 2.240 | -0.229           | 0.708 | 1.422 | 1.863 |

|                                   |        |        |        |        |        |       |       |       |        |        |       |       |
|-----------------------------------|--------|--------|--------|--------|--------|-------|-------|-------|--------|--------|-------|-------|
| C <sub>120</sub> H <sub>242</sub> | -0.934 | -0.086 | 0.324  | 0.653  | 0.423  | 1.241 | 1.806 | 2.199 | -0.331 | 0.609  | 1.302 | 1.790 |
| C <sub>160</sub> H <sub>322</sub> | -1.048 | -0.270 | 0.119  | 0.438  | 0.284  | 1.136 | 1.749 | 2.165 | -0.414 | 0.555  | 1.216 | 1.733 |
| C <sub>200</sub> H <sub>402</sub> | -1.142 | -0.362 | 0.009  | 0.321  | 0.185  | 1.068 | 1.710 | 2.137 | -0.469 | 0.502  | 1.160 | 1.685 |
| C <sub>240</sub> H <sub>482</sub> | -1.189 | -0.431 | -0.075 | 0.220  | 0.115  | 1.011 | 1.680 | 2.114 | -0.514 | 0.467  | 1.118 | 1.652 |
| C <sub>280</sub> H <sub>562</sub> | -1.232 | -0.489 | -0.147 | 0.130  | 0.056  | 0.962 | 1.656 | 2.095 | -0.552 | 0.438  | 1.082 | 1.620 |
| C <sub>320</sub> H <sub>642</sub> | -1.280 | -0.540 | -0.208 | 0.055  | 0.005  | 0.920 | 1.635 | 2.080 | -0.585 | 0.413  | 1.051 | 1.591 |
| C <sub>360</sub> H <sub>722</sub> | -1.314 | -0.582 | -0.260 | -0.024 | -0.037 | 0.885 | 1.618 | 2.065 | -0.613 | 0.392  | 1.026 | 1.573 |
| C <sub>400</sub> H <sub>802</sub> | -1.348 | -0.624 | -0.311 | -0.059 | -0.080 | 0.850 | 1.600 | 2.050 | -0.640 | -0.370 | 1.002 | 1.550 |

S. Table 2. Logarithm of friction coefficients  $\zeta$  (g/ps·mol) of  $n$ -alkanes, MY1, and MY2 in  $n$ -alkanes at T = 318, 418, 518, and 618 K.

| $n$ -alkane                       | $\zeta_{\text{self}}$ |       |       |       | $\zeta_{\text{MY1}}$ |       |       |       | $\zeta_{\text{MY2}}$ |       |       |       |
|-----------------------------------|-----------------------|-------|-------|-------|----------------------|-------|-------|-------|----------------------|-------|-------|-------|
|                                   | 318K                  | 418K  | 51 K  | 618K  | 318K                 | 418K  | 518K  | 618K  | 318K                 | 418K  | 518K  | 618K  |
| C <sub>12</sub> H <sub>26</sub>   | 2.850                 | 2.768 | 2.680 | 2.570 | 2.367                | 2.301 | 2.225 | 2.134 | 2.609                | 2.516 | 2.436 | 2.368 |
| C <sub>20</sub> H <sub>42</sub>   | 3.072                 | 2.996 | 2.918 | 2.838 | 2.418                | 2.354 | 2.288 | 2.207 | 2.657                | 2.567 | 2.491 | 2.429 |
| C <sub>28</sub> H <sub>58</sub>   | 3.218                 | 3.144 | 3.071 | 2.997 | 2.445                | 2.383 | 2.322 | 2.250 | 2.687                | 2.598 | 2.521 | 2.463 |
| C <sub>36</sub> H <sub>74</sub>   | 3.331                 | 3.256 | 3.182 | 3.110 | 2.462                | 2.401 | 2.340 | 2.274 | 2.704                | 2.611 | 2.541 | 2.486 |
| C <sub>44</sub> H <sub>90</sub>   | 3.422                 | 3.346 | 3.272 | 3.204 | 2.478                | 2.415 | 2.354 | 2.290 | 2.711                | 2.619 | 2.554 | 2.500 |
| C <sub>80</sub> H <sub>162</sub>  | 3.694                 | 3.616 | 3.541 | 3.472 | 2.513                | 2.453 | 2.391 | 2.326 | 2.723                | 2.630 | 2.581 | 2.530 |
| C <sub>120</sub> H <sub>242</sub> | 3.856                 | 3.798 | 3.724 | 3.654 | 2.531                | 2.470 | 2.409 | 2.348 | 2.726                | 2.639 | 2.598 | 2.547 |
| C <sub>160</sub> H <sub>322</sub> | 3.974                 | 3.915 | 3.857 | 3.791 | 2.545                | 2.483 | 2.421 | 2.359 | 2.731                | 2.645 | 2.610 | 2.555 |
| C <sub>200</sub> H <sub>402</sub> | 4.064                 | 4.014 | 3.995 | 3.890 | 2.553                | 2.492 | 2.431 | 2.369 | 2.735                | 2.647 | 2.619 | 2.566 |
| C <sub>240</sub> H <sub>482</sub> | 4.130                 | 4.090 | 4.031 | 3.962 | 2.562                | 2.500 | 2.439 | 2.377 | 2.737                | 2.651 | 2.627 | 2.574 |
| C <sub>280</sub> H <sub>562</sub> | 4.202                 | 4.162 | 4.100 | 4.404 | 2.569                | 2.507 | 2.446 | 2.383 | 2.739                | 2.654 | 2.633 | 2.580 |
| C <sub>320</sub> H <sub>642</sub> | 4.249                 | 4.209 | 4.160 | 4.098 | 2.575                | 2.513 | 2.450 | 2.388 | 2.741                | 2.657 | 2.639 | 2.586 |
| C <sub>360</sub> H <sub>722</sub> | 4.301                 | 4.259 | 4.205 | 4.148 | 2.580                | 2.518 | 2.454 | 2.393 | 2.743                | 2.660 | 2.644 | 2.591 |
| C <sub>400</sub> H <sub>802</sub> | 4.352                 | 4.309 | 4.250 | 4.196 | 2.584                | 2.522 | 2.460 | 2.397 | 2.744                | 2.662 | 2.648 | 2.596 |
